# Supplementary material
Source: publisher figshare collection journal article supplement (https://acs.figshare.com/ndownloader/files/5123908)
Supplement: Supplementary file 1 [file 5123908]

**Aerobic Catechol Oxidation Catalyzed by a Bis( $\pi$ -oxo)dimanganese(III,III) Complex via a Manganese(II)–semiquinonate Complex**

Yutaka Hitomi,<sup>\*,†</sup> Akira Ando,<sup>†</sup> Hajime Matsui,<sup>†</sup> Tomoyuki Ito,<sup>†</sup> Tsunehiro Tanaka,<sup>†</sup> Seiji Ogo,<sup>‡</sup> and Takuzo Funabiki<sup>\*,§</sup>

Department of Molecular Engineering, Graduate School of Engineering, Kyoto University, Katsura, Nishikyo-ku, Kyoto 615-8510, Japan, Department of Material and Life Science, Graduate School of Engineering, Osaka University, Suita, Osaka 565-0871, Japan, and Biomimetics Research Center, Doshisha University, Kyo-Tanabe, Kyoto 610-0321, Japan

<sup>†</sup> Kyoto University

<sup>‡</sup> Osaka University

<sup>§</sup> BMRC, Doshisha University

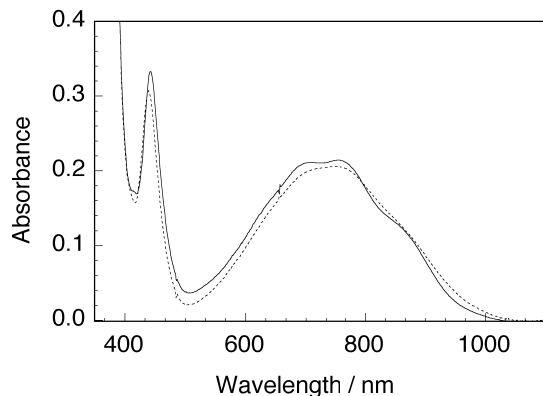

**Figure S1.** Electronic absorption spectra of **1** in propionitrile (0.5 mM) at 213 K (solid line) and 298 K (dotted line).

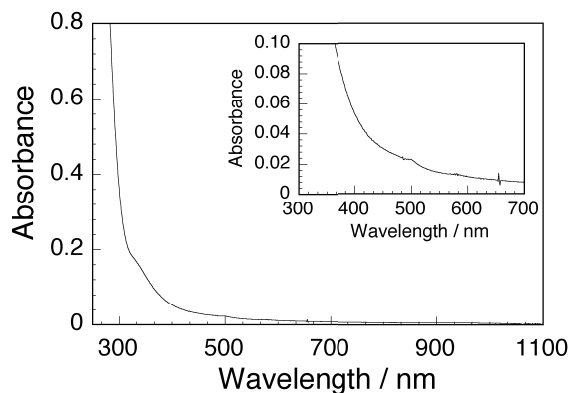

**Figure S2.** Electronic absorption spectrum of **2** in acetonitrile at 298 K.

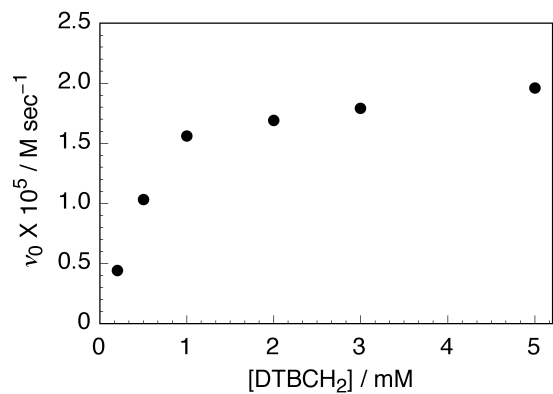

**Figure S3.** Michaelis-Menten plot of DTBCH<sub>2</sub> oxidation in acetonitrile under 1 atm of O<sub>2</sub> at 298 K. [2] = 0.1 mM.

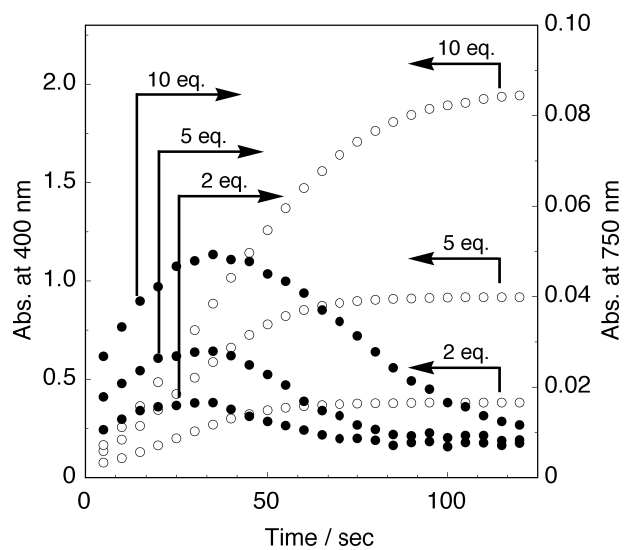

**Figure S4.** Time course of the absorbance changes at 400 and 750 nm in varied concentrations of DTBCH<sub>2</sub>. Conditions: [2] = 0.1 mM, [DTBCH<sub>2</sub>] = 0.2, 0.5, and 1.0 mM.
